# Supplementary material for: Interactions of peroxy radicals from monoterpene and isoprene oxidation simulated in the radical volatility basis set
Source: Royal Society of Chemistry journal article supplement (doi:10.1039/d4ea00056k), 2024-01-01
Supplement: d4ea00056k2.pdf [file d4ea00056k2.pdf]

Supplemental Information for:

## Interactions of peroxy radicals from monoterpene and isoprene oxidation simulated in the radical Volatility Basis Set

Meredith Schervish, Martin Heinritzi, Dominik Stolzenburg, Lubna Dada, Mingyi Wang, Qing Ye, Victoria Hofbauer, Jenna DeVivo, Federico Bianchi, Sophia Brilke, Jonathan Duplissy, Imad El Haddad, Henning Finkenzeller, Xu-Cheng He, Alexander Kvashnin, Changhyuk Kim, Jasper Kirkby, Markku Kulmala, Katrianne Lehtipalo, Brandon Lopez, Vladimir Makhmutov, Bernhard Mentler, Ugo Molteni, Wei Nie, Tuuka Petäjä, Lauriane Quéléver, Rainer Volkamer, Andrea C. Wagner, Paul Winkler, Chao Yan, and Neil M. Donahue

Table 1: Kinetic parameters for  $\alpha$ -pinene and isoprene autoxidation and association reactions.

| $E_a$            | 7300 K                                          |
|------------------|-------------------------------------------------|
| $A_{ap1}$        | $7.2 \times 10^9 \text{ s}^{-1}$                |
| $A_{ap2}$        | $2 \times 10^9 \text{ s}^{-1}$                  |
| $A_{ap3}$        | $8 \times 10^8 \text{ s}^{-1}$                  |
| $A_{ip1}$        | $8 \times 10^8 \text{ s}^{-1}$                  |
| $A_{ip2}$        | $4 \times 10^8 \text{ s}^{-1}$                  |
| $A_{ip3}$        | $1.8 \times 10^8 \text{ s}^{-1}$                |
| $k_{apOx_0RO_2}$ | $5 \times 10^{-12} \text{ cm}^3 \text{ s}^{-1}$ |
| $k_{apOx_1RO_2}$ | $10^{-11} \text{ cm}^3 \text{ s}^{-1}$          |
| $k_{apOx_2RO_2}$ | $5 \times 10^{-11} \text{ cm}^3 \text{ s}^{-1}$ |
| $k_{apOx_3RO_2}$ | $10^{-10} \text{ cm}^3 \text{ s}^{-1}$          |
| $k_{ipOx_0RO_2}$ | $5 \times 10^{-12} \text{ cm}^3 \text{ s}^{-1}$ |
| $k_{ipOx_1RO_2}$ | $10^{-11} \text{ cm}^3 \text{ s}^{-1}$          |
| $k_{ipOx_2RO_2}$ | $5 \times 10^{-11} \text{ cm}^3 \text{ s}^{-1}$ |
| $k_{ipOx_3RO_2}$ | $10^{-10} \text{ cm}^3 \text{ s}^{-1}$          |

Table 2: Isoprene reactions and rate coefficients

| #  | Reaction                                                                                                                                                                     | Rate coefficient*                                                    |
|----|------------------------------------------------------------------------------------------------------------------------------------------------------------------------------|----------------------------------------------------------------------|
| 1  | $\text{ip} + \text{O}_3 \longrightarrow 0.25 \text{ipOx}_0\text{RO}_2 + 0.75 \text{ipRO}_2$                                                                                  | $9.6 \times 10^{-18}$                                                |
| 2  | $\text{ip} + \text{OH} \longrightarrow 0.5 \text{ipRO}_2 + 0.5 \text{ipOx}_0\text{RO}_2$                                                                                     | $10^{-10}$                                                           |
| 3  | $\text{ipOx}_0\text{RO}_2 \longrightarrow \text{ipOx}_1\text{RO}_2$                                                                                                          | $A_{\text{ip}_1} \exp(-E_a/T)$                                       |
| 4  | $\text{HO}_2 + \text{ipOx}_0\text{RO}_2 \longrightarrow \text{ipOx}_0\text{ROOH}$                                                                                            | $10^{-11}$                                                           |
| 5  | $2 \text{ipOx}_0\text{RO}_2 \longrightarrow \gamma \text{ipOx}_0\text{Ox}_0\text{ROOR} + 2 \alpha \text{ipOx}_0\text{RO}$                                                    | $k_{\text{ipOx}_0\text{RO}_2}$                                       |
| 6  | $\text{ipOx}_0\text{RO}_2 \longrightarrow \text{ipOx}_0\text{RO}$                                                                                                            | $6 \times 10^{-8}$                                                   |
| 7  | $\text{ipOx}_1\text{RO}_2 \longrightarrow \text{ipOx}_2\text{RO}_2$                                                                                                          | $A_{\text{ip}_2} \exp(-E_a/T)$                                       |
| 8  | $\text{HO}_2 + \text{ipOx}_1\text{RO}_2 \longrightarrow \text{ipOx}_1\text{ROOH}$                                                                                            | $10^{-11}$                                                           |
| 9  | $\text{ipOx}_1\text{RO}_2 + \text{ipOx}_0\text{RO}_2 \longrightarrow \gamma \text{ipOx}_1\text{Ox}_0\text{ROOR} + \alpha(\text{ipOx}_0\text{RO} + \text{ipOx}_1\text{RO})$   | $2 \sqrt{k_{\text{ipOx}_0\text{RO}_2} k_{\text{ipOx}_1\text{RO}_2}}$ |
| 10 | $2 \text{ipOx}_1\text{RO}_2 \longrightarrow \gamma \text{ipOx}_1\text{ipOx}_1\text{ROOR} + 2 \alpha \text{ipOx}_1\text{RO}$                                                  | $k_{\text{ipOx}_1\text{RO}_2}$                                       |
| 11 | $\text{ipOx}_1\text{RO}_2 \longrightarrow \text{ipOx}_1\text{RO}$                                                                                                            | $6 \times 10^{-8}$                                                   |
| 12 | $\text{ipOx}_2\text{RO}_2 \longrightarrow \text{ipOx}_3\text{RO}_2$                                                                                                          | $A_{\text{ip}_3} \exp(-E_a/T)$                                       |
| 13 | $\text{HO}_2 + \text{ipOx}_2\text{RO}_2 \longrightarrow \text{ipOx}_2\text{ROOH}$                                                                                            | $10^{-11}$                                                           |
| 14 | $\text{ipOx}_2\text{RO}_2 + \text{ipOx}_0\text{RO}_2 \longrightarrow \gamma \text{ipOx}_2\text{Ox}_0\text{ROOR} + \alpha(\text{ipOx}_0\text{RO} + \text{ipOx}_2\text{RO})$   | $2 \sqrt{k_{\text{ipOx}_2\text{RO}_2} k_{\text{ipOx}_0\text{RO}_2}}$ |
| 15 | $\text{ipOx}_1\text{RO}_2 + \text{ipOx}_2\text{RO}_2 \longrightarrow \gamma \text{ipOx}_2\text{ipOx}_1\text{ROOR} + \alpha(\text{ipOx}_2\text{RO} + \text{ipOx}_1\text{RO})$ | $\sqrt{k_{\text{ipOx}_1\text{RO}_2} k_{\text{ipOx}_2\text{RO}_2}}$   |
| 16 | $2 \text{ipOx}_2\text{RO}_2 \longrightarrow \gamma \text{ipOx}_2\text{ipOx}_2\text{ROOR} + 2 \alpha \text{ipOx}_2\text{RO}$                                                  | $k_{\text{ipOx}_2\text{RO}_2}$                                       |
| 17 | $\text{ipOx}_2\text{RO}_2 \longrightarrow \text{ipOx}_2\text{RO}$                                                                                                            | $6 \times 10^{-8}$                                                   |
| 18 | $\text{HO}_2 + \text{ipOx}_3\text{RO}_2 \longrightarrow \text{ipOx}_3\text{ROOH}$                                                                                            | $10^{-11}$                                                           |
| 19 | $\text{ipOx}_3\text{RO}_2 + \text{ipOx}_0\text{RO}_2 \longrightarrow \gamma \text{ipOx}_3\text{ROOR} + \alpha(\text{ipOx}_0\text{RO} + \text{ipOx}_3\text{RO})$              | $2 \sqrt{k_{\text{ipOx}_3\text{RO}_2} k_{\text{ipOx}_0\text{RO}_2}}$ |
| 20 | $\text{ipOx}_1\text{RO}_2 + \text{ipOx}_3\text{RO}_2 \longrightarrow \gamma \text{ipOx}_3\text{ipOx}_1\text{ROOR} + \alpha(\text{ipOx}_3\text{RO} + \text{ipOx}_1\text{RO})$ | $2 \sqrt{k_{\text{ipOx}_1\text{RO}_2} k_{\text{ipOx}_3\text{RO}_2}}$ |
| 21 | $\text{ipOx}_2\text{RO}_2 + \text{ipOx}_3\text{RO}_2 \longrightarrow \gamma \text{ipOx}_3\text{ipOx}_2\text{ROOR} + \alpha(\text{ipOx}_3\text{RO} + \text{ipOx}_2\text{RO})$ | $2 \sqrt{k_{\text{ipOx}_2\text{RO}_2} k_{\text{ipOx}_3\text{RO}_2}}$ |
| 22 | $2 \text{ipOx}_3\text{RO}_2 \longrightarrow \gamma \text{ipOx}_3\text{ipOx}_3\text{ROOR} + 2 \alpha \text{ipOx}_3\text{RO}$                                                  | $k_{\text{ipOx}_3\text{RO}_2}$                                       |
| 23 | $\text{ipOx}_3\text{RO}_2 \longrightarrow \text{ipOx}_3\text{RO}$                                                                                                            | $6 \times 10^{-8}$                                                   |

\* First-order coefficients have units  $\text{s}^{-1}$ ; second-order coefficients have units  $\text{cm}^3 \text{s}^{-1}$ .

$\gamma$  and  $\alpha$  represent the branching between dimer formation and alkoxy radical formation, respectively, as discussed in section 2.1.

Table 3: Isoprene and  $\alpha$ -pinene cross reactions and rate coefficients

| #  | Reaction                                                                                                                                                                    | Rate coefficient*                                                    |
|----|-----------------------------------------------------------------------------------------------------------------------------------------------------------------------------|----------------------------------------------------------------------|
| 24 | $\text{apOx}_0\text{RO}_2 + \text{ipOx}_0\text{RO}_2 \longrightarrow \gamma\text{apOx}_0\text{ipOx}_0\text{ROOR} + \alpha(\text{apRO} + \text{ipOx}_0\text{RO})$            | $2 \sqrt{k_{\text{apOx}_0\text{RO}_2} k_{\text{ipOx}_0\text{RO}_2}}$ |
| 25 | $\text{apOx}_0\text{RO}_2 + \text{ipOx}_1\text{RO}_2 \longrightarrow \gamma\text{apOx}_0\text{ipOx}_1\text{ROOR} + \alpha(\text{apRO} + \text{ipOx}_1\text{RO})$            | $2 \sqrt{k_{\text{apOx}_0\text{RO}_2} k_{\text{ipOx}_1\text{RO}_2}}$ |
| 26 | $\text{apOx}_0\text{RO}_2 + \text{ipOx}_2\text{RO}_2 \longrightarrow \gamma\text{apOx}_0\text{ipOx}_2\text{ROOR} + \alpha(\text{apRO} + \text{ipOx}_2\text{RO})$            | $2 \sqrt{k_{\text{apOx}_0\text{RO}_2} k_{\text{ipOx}_2\text{RO}_2}}$ |
| 27 | $\text{apOx}_0\text{RO}_2 + \text{ipOx}_3\text{RO}_2 \longrightarrow \gamma\text{apOx}_0\text{ipOx}_3\text{ROOR} + \alpha(\text{apRO} + \text{ipOx}_3\text{RO})$            | $2 \sqrt{k_{\text{apOx}_0\text{RO}_2} k_{\text{ipOx}_3\text{RO}_2}}$ |
| 28 | $\text{apOx}_1\text{RO}_2 + \text{ipOx}_0\text{RO}_2 \longrightarrow \gamma\text{apOx}_1\text{ipOx}_0\text{ROOR} + \alpha(\text{apOx}_1\text{RO} + \text{ipOx}_0\text{RO})$ | $2 \sqrt{k_{\text{apOx}_1\text{RO}_2} k_{\text{ipOx}_0\text{RO}_2}}$ |
| 29 | $\text{apOx}_1\text{RO}_2 + \text{ipOx}_1\text{RO}_2 \longrightarrow \gamma\text{apOx}_1\text{ipOx}_1\text{ROOR} + \alpha(\text{apOx}_1\text{RO} + \text{ipOx}_1\text{RO})$ | $2 \sqrt{k_{\text{apOx}_1\text{RO}_2} k_{\text{ipOx}_1\text{RO}_2}}$ |
| 30 | $\text{apOx}_1\text{RO}_2 + \text{ipOx}_2\text{RO}_2 \longrightarrow \gamma\text{apOx}_1\text{ipOx}_2\text{ROOR} + \alpha(\text{apOx}_1\text{RO} + \text{ipOx}_2\text{RO})$ | $2 \sqrt{k_{\text{apOx}_1\text{RO}_2} k_{\text{ipOx}_2\text{RO}_2}}$ |
| 31 | $\text{apOx}_1\text{RO}_2 + \text{ipOx}_3\text{RO}_2 \longrightarrow \gamma\text{apOx}_1\text{ipOx}_3\text{ROOR} + \alpha(\text{apOx}_1\text{RO} + \text{ipOx}_3\text{RO})$ | $2 \sqrt{k_{\text{apOx}_1\text{RO}_2} k_{\text{ipOx}_3\text{RO}_2}}$ |
| 32 | $\text{apOx}_2\text{RO}_2 + \text{ipOx}_0\text{RO}_2 \longrightarrow \gamma\text{apOx}_2\text{ipOx}_0\text{ROOR} + \alpha(\text{apOx}_2\text{RO} + \text{ipOx}_0\text{RO})$ | $2 \sqrt{k_{\text{apOx}_2\text{RO}_2} k_{\text{ipOx}_0\text{RO}_2}}$ |
| 33 | $\text{apOx}_2\text{RO}_2 + \text{ipOx}_1\text{RO}_2 \longrightarrow \gamma\text{apOx}_2\text{ipOx}_1\text{ROOR} + \alpha(\text{apOx}_2\text{RO} + \text{ipOx}_1\text{RO})$ | $2 \sqrt{k_{\text{apOx}_2\text{RO}_2} k_{\text{ipOx}_1\text{RO}_2}}$ |
| 34 | $\text{apOx}_2\text{RO}_2 + \text{ipOx}_2\text{RO}_2 \longrightarrow \gamma\text{apOx}_2\text{ipOx}_2\text{ROOR} + \alpha(\text{apOx}_2\text{RO} + \text{ipOx}_2\text{RO})$ | $2 \sqrt{k_{\text{apOx}_2\text{RO}_2} k_{\text{ipOx}_2\text{RO}_2}}$ |
| 35 | $\text{apOx}_2\text{RO}_2 + \text{ipOx}_3\text{RO}_2 \longrightarrow \gamma\text{apOx}_2\text{ipOx}_3\text{ROOR} + \alpha(\text{apOx}_2\text{RO} + \text{ipOx}_3\text{RO})$ | $2 \sqrt{k_{\text{apOx}_2\text{RO}_2} k_{\text{ipOx}_3\text{RO}_2}}$ |
| 36 | $\text{apOx}_3\text{RO}_2 + \text{ipOx}_0\text{RO}_2 \longrightarrow \gamma\text{apOx}_3\text{ipOx}_0\text{ROOR} + \alpha(\text{apOx}_3\text{RO} + \text{ipOx}_0\text{RO})$ | $2 \sqrt{k_{\text{apOx}_3\text{RO}_2} k_{\text{ipOx}_0\text{RO}_2}}$ |
| 37 | $\text{apOx}_3\text{RO}_2 + \text{ipOx}_1\text{RO}_2 \longrightarrow \gamma\text{apOx}_3\text{ipOx}_1\text{ROOR} + \alpha(\text{apOx}_3\text{RO} + \text{ipOx}_1\text{RO})$ | $2 \sqrt{k_{\text{apOx}_3\text{RO}_2} k_{\text{ipOx}_1\text{RO}_2}}$ |
| 38 | $\text{apOx}_3\text{RO}_2 + \text{ipOx}_2\text{RO}_2 \longrightarrow \gamma\text{apOx}_3\text{ipOx}_2\text{ROOR} + \alpha(\text{apOx}_3\text{RO} + \text{ipOx}_2\text{RO})$ | $2 \sqrt{k_{\text{apOx}_3\text{RO}_2} k_{\text{ipOx}_2\text{RO}_2}}$ |
| 39 | $\text{apOx}_3\text{RO}_2 + \text{ipOx}_3\text{RO}_2 \longrightarrow \gamma\text{apOx}_3\text{ipOx}_3\text{ROOR} + \alpha(\text{apOx}_3\text{RO} + \text{ipOx}_3\text{RO})$ | $2 \sqrt{k_{\text{apOx}_3\text{RO}_2} k_{\text{ipOx}_3\text{RO}_2}}$ |

\* First-order coefficients have units  $\text{s}^{-1}$ ; second-order coefficients have units  $\text{cm}^3 \text{s}^{-1}$ .

$\gamma$  and  $\alpha$  represent the branching between dimer formation and alkoxy radical formation, respectively, as discussed in section 2.1.

Table 4: Inorganic photochemical reactions and rate coefficients used in this work

| #  | Reaction                                                                      | Rate coefficient*                                                          |
|----|-------------------------------------------------------------------------------|----------------------------------------------------------------------------|
| 40 | $\text{O}_2 + h\nu \longrightarrow 2 \text{O}(^3\text{P})$                    | $j = 6.0 \times 10^{-34}$                                                  |
| 41 | $\text{O}_3 + h\nu \longrightarrow \text{O}_2 + \text{O}(^3\text{P})$         | $j = 10^{-6}$                                                              |
| 42 | $\text{O}_3 + h\nu \longrightarrow \text{O}(^1\text{D}) + \text{O}_2$         | $j = 1.2 \times 10^{-7}$                                                   |
| 43 | $\text{O}_2 + \text{O}(^3\text{P}) \longrightarrow \text{O}_3$                | $k_0 = 6.0 \times 10^{-34} (T/300)^{-2.4}, k_\infty = 3.0 \times 10^{-12}$ |
| 44 | $\text{H}_2\text{O} + \text{O}(^1\text{D}) \longrightarrow 2 \text{OH}$       | $2.2 \times 10^{-10}$                                                      |
| 45 | $\text{HO}_2 + \text{O}_3 \longrightarrow 2 \text{O}_2 + \text{OH}$           | $1.1 \times 10^{-14} \exp(-490/T)$                                         |
| 46 | $\text{O}(^3\text{P}) + \text{OH} \longrightarrow \text{O}_2 + \text{H}$      | $2.2 \times 10^{-11} \exp(-120/T)$                                         |
| 47 | $\text{O}(^3\text{P}) + \text{HO}_2 \longrightarrow \text{OH} + \text{O}_2$   | $3 \times 10^{-11} \exp(-200/T)$                                           |
| 48 | $\text{HO}_2 + \text{HO}_2 \longrightarrow \text{H}_2\text{O}_2 + \text{O}_2$ | $3.0 \times 10^{-13} \times \exp(460/T)$                                   |
| 50 | $\text{O}_3 + \text{OH} \longrightarrow \text{HO}_2 + \text{O}_2$             | $1.7 \times 10^{-12} \exp(-940/T)$                                         |

\* First-order coefficients have units  $\text{s}^{-1}$ ; second-order coefficients have units  $\text{cm}^3 \text{s}^{-1}$ .

Table 5:  $\alpha$ -Pinene (ap) chemical reactions and rate coefficients used in this work.

| #  | Reaction                                                                                                                                                                   | Rate coefficient*                                                    |
|----|----------------------------------------------------------------------------------------------------------------------------------------------------------------------------|----------------------------------------------------------------------|
| 51 | $\text{ap} + \text{O}_3 \longrightarrow 0.25 \text{apOx}_0\text{RO}_2 + 0.75 \text{apRO}_2 + 0.8 \text{OH}$                                                                | $8 \times 10^{-17}$                                                  |
| 52 | $\text{ap} + \text{OH} \longrightarrow 0.25 \text{apOx}_0\text{RO}_2 + 0.75 \text{apRO}_2$                                                                                 | $5.4 \times 10^{-11}$                                                |
| 53 | $\text{apOx}_0\text{RO}_2 \longrightarrow \text{apOx}_1\text{RO}_2$                                                                                                        | $A_{\text{ap1}} \exp(-E_a/T)$                                        |
| 54 | $\text{HO}_2 + \text{apOx}_0\text{RO}_2 \longrightarrow \text{ROOH}$                                                                                                       | $10^{-11}$                                                           |
| 55 | $2 \text{apOx}_0\text{RO}_2 \longrightarrow \gamma \text{apOx}_0\text{Ox}_0\text{ROOR} + 2 \alpha \text{apOx}_0\text{RO}$                                                  | $k_{\text{apOx}_0\text{RO}_2}$                                       |
| 56 | $\text{apOx}_0\text{RO}_2 \longrightarrow \text{apOx}_0\text{RO}$                                                                                                          | $6 \times 10^{-8}$                                                   |
| 57 | $\text{apOx}_1\text{RO}_2 \longrightarrow \text{apOx}_2\text{RO}_2$                                                                                                        | $A_{\text{ap2}} \exp(-E_a/T)$                                        |
| 58 | $\text{HO}_2 + \text{apOx}_1\text{RO}_2 \longrightarrow \text{apOx}_1\text{ROOH}$                                                                                          | $10^{-11}$                                                           |
| 59 | $\text{apOx}_1\text{RO}_2 + \text{apOx}_0\text{RO}_2 \longrightarrow \gamma \text{apOx}_1\text{Ox}_0\text{ROOR} + \alpha(\text{apOx}_0\text{RO} + \text{apOx}_1\text{RO})$ | $2 \sqrt{k_{\text{apOx}_1\text{RO}_2} k_{\text{apOx}_0\text{RO}_2}}$ |
| 60 | $2 \text{apOx}_1\text{RO}_2 \longrightarrow \gamma \text{apOx}_1\text{Ox}_1\text{ROOR} + 2 \alpha \text{apOx}_1\text{RO}$                                                  | $k_{\text{apOx}_2\text{RO}_2}$                                       |
| 61 | $\text{apOx}_1\text{RO}_2 \longrightarrow \text{apOx}_1\text{RO}$                                                                                                          | $6 \times 10^{-8}$                                                   |
| 62 | $\text{apOx}_2\text{RO}_2 \longrightarrow \text{apOx}_3\text{RO}_2$                                                                                                        | $A_{\text{ap3}} \exp(-E_a/T)$                                        |
| 63 | $\text{HO}_2 + \text{apOx}_2\text{RO}_2 \longrightarrow \text{apOx}_2\text{ROOH}$                                                                                          | $10^{-11}$                                                           |
| 64 | $\text{apOx}_2\text{RO}_2 + \text{apOx}_0\text{RO}_2 \longrightarrow \gamma \text{apOx}_2\text{Ox}_0\text{ROOR} + \alpha(\text{apOx}_0\text{RO} + \text{apOx}_2\text{RO})$ | $2 \sqrt{k_{\text{apOx}_2\text{RO}_2} k_{\text{apOx}_0\text{RO}_2}}$ |
| 65 | $\text{apOx}_1\text{RO}_2 + \text{apOx}_2\text{RO}_2 \longrightarrow \gamma \text{apOx}_2\text{Ox}_1\text{ROOR} + \alpha(\text{apOx}_2\text{RO} + \text{apOx}_1\text{RO})$ | $2 \sqrt{k_{\text{apOx}_1\text{RO}_2} k_{\text{apOx}_2\text{RO}_2}}$ |
| 66 | $2 \text{apOx}_2\text{RO}_2 \longrightarrow \gamma \text{apOx}_2\text{Ox}_2\text{ROOR} + 2 \alpha \text{apOx}_2\text{RO}$                                                  | $k_{\text{apOx}_2\text{RO}_2}$                                       |
| 67 | $\text{apOx}_2\text{RO}_2 \longrightarrow \text{apOx}_2\text{RO}$                                                                                                          | $6 \times 10^{-8}$                                                   |
| 68 | $\text{HO}_2 + \text{apOx}_3\text{RO}_2 \longrightarrow \text{apOx}_3\text{ROOH}$                                                                                          | $10^{-11}$                                                           |
| 69 | $\text{apOx}_3\text{RO}_2 + \text{apOx}_0\text{RO}_2 \longrightarrow \gamma \text{apOx}_3\text{Ox}_0\text{ROOR} + \alpha(\text{apOx}_0\text{RO} + \text{apOx}_3\text{RO})$ | $2 \sqrt{k_{\text{apOx}_3\text{RO}_2} k_{\text{apOx}_0\text{RO}_2}}$ |
| 70 | $\text{apOx}_1\text{RO}_2 + \text{apOx}_3\text{RO}_2 \longrightarrow \gamma \text{apOx}_3\text{Ox}_1\text{ROOR} + \alpha(\text{apOx}_3\text{RO} + \text{apOx}_1\text{RO})$ | $2 \sqrt{k_{\text{apOx}_1\text{RO}_2} k_{\text{apOx}_3\text{RO}_2}}$ |
| 71 | $\text{apOx}_2\text{RO}_2 + \text{apOx}_3\text{RO}_2 \longrightarrow \gamma \text{apOx}_3\text{Ox}_2\text{ROOR} + \alpha(\text{apOx}_3\text{RO} + \text{apOx}_2\text{RO})$ | $2 \sqrt{k_{\text{apOx}_2\text{RO}_2} k_{\text{apOx}_3\text{RO}_2}}$ |
| 72 | $2 \text{apOx}_3\text{RO}_2 \longrightarrow \gamma \text{apOx}_3\text{Ox}_3\text{ROOR} + 2 \alpha \text{apOx}_3\text{RO}$                                                  | $k_{\text{apOx}_3\text{RO}_2}$                                       |
| 73 | $\text{apOx}_3\text{RO}_2 \longrightarrow \text{apOx}_3\text{RO}$                                                                                                          | $6 \times 10^{-8}$                                                   |

\* First-order coefficients have units  $\text{s}^{-1}$ ; second-order coefficients have units  $\text{cm}^3 \text{s}^{-1}$ .

$\gamma$  and  $\alpha$  represent the branching between dimer formation and alkoxy radical formation, respectively, as discussed in section 2.1.

Reactions specified with  $k_0$  and  $k_\infty$  are pressure-dependent with the rate coefficient at a specific pressure given by

$$k = \left( \frac{k_0 c_M}{1 + \frac{k_0 c_M}{k_\infty}} \right) 0.6^{(1 + (\log(\frac{k_0 c_M}{k_\infty}))^2)^{-1}} \quad (1)$$

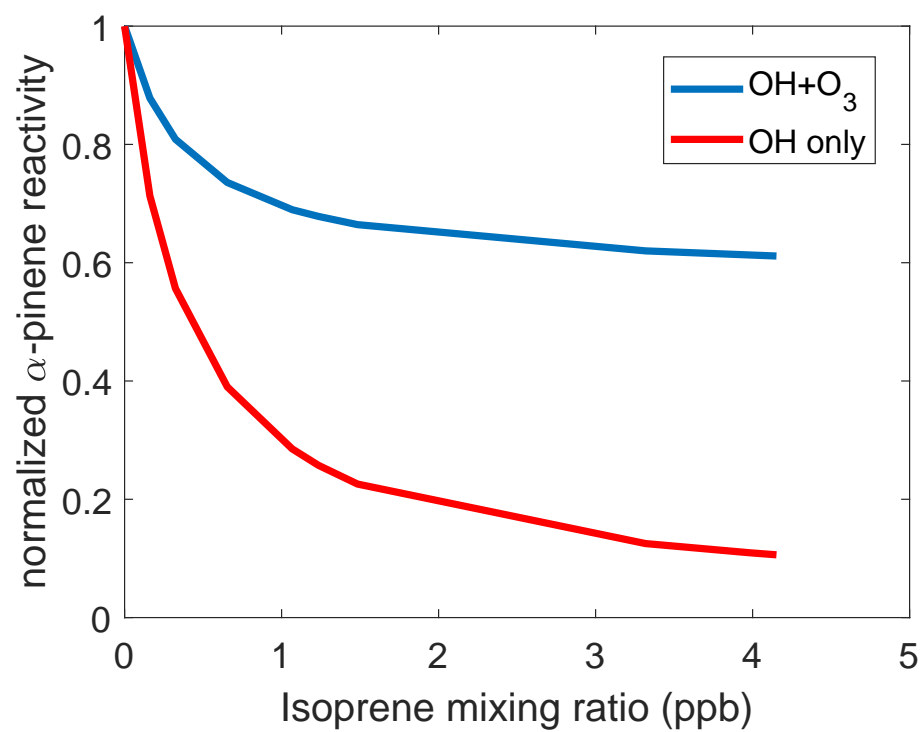

Figure S1: The  $\alpha$ -pinene reactivity normalized to the  $\alpha$ -pinene reactivity with no isoprene present. Shown is the case simulated in this work where  $\alpha$ -pinene mainly reacts with ozone (blue) and a case where no ozone is present, and  $\alpha$ -pinene only reacts with OH (red).
