# Supplementary figures and images for: Interactions of peroxy radicals from monoterpene and isoprene oxidation simulated in the radical volatility basis set
Source: Royal Society of Chemistry journal article supplement (doi:10.1039/d4ea00056k), 2024-01-01

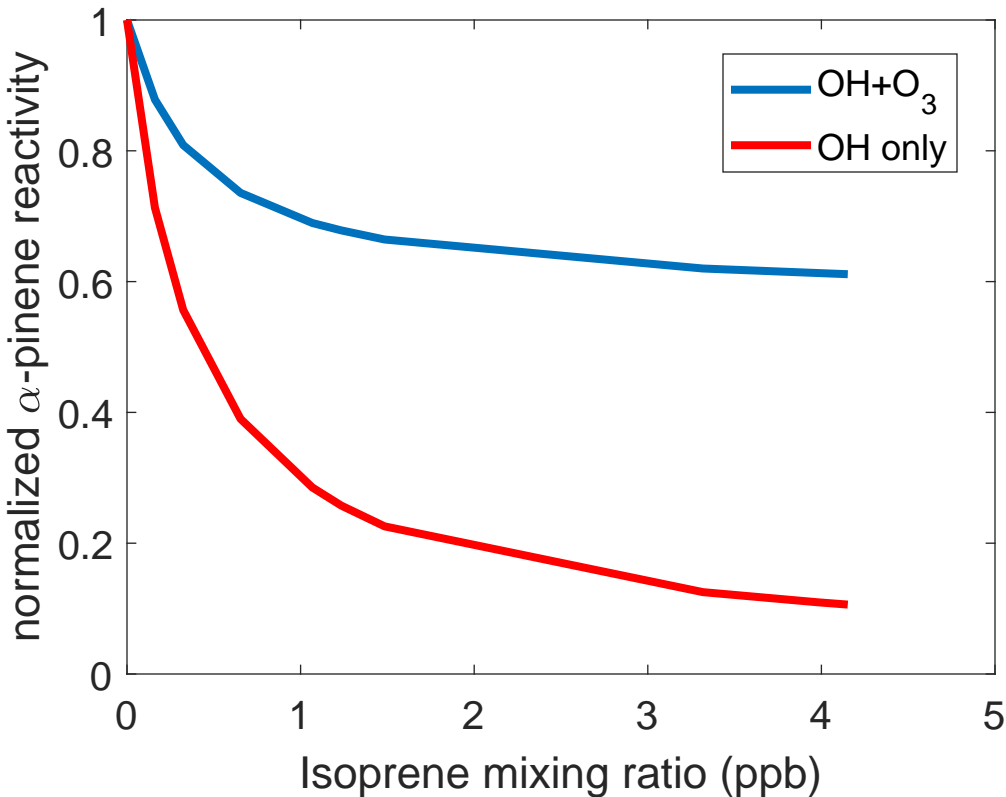

Supplement: d4ea00056k1.pdf [file d4ea00056k1.pdf]
